# Supplementary material for: Carbon Dioxide Adsorption in Betulin-Based Micro- and Macroporous Polyurethanes
Source: PubMed Central journal article supplement (PMC3594587; doi:10.1002/open.201200045), 2013-01-18
Supplement: open0002-0017-SD1.pdf [file open0002-0017-SD1.pdf]

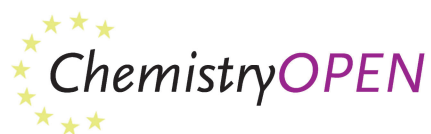

## Supporting Information

© 2013 The Authors. Published by Wiley-VCH Verlag GmbH & Co. KGaA, Weinheim

### **Carbon Dioxide Adsorption in Betulin-Based Micro- and Macroporous Polyurethanes**

Jekaterina Jeromenok,<sup>[a]</sup> Winfried Böhlmann,<sup>[b]</sup> Christian Jäger,<sup>[c]</sup> and Jens Weber<sup>\*[a]</sup>

open\_201200045\_sm\_miscellaneous\_information.pdf

**monolithic structure:**

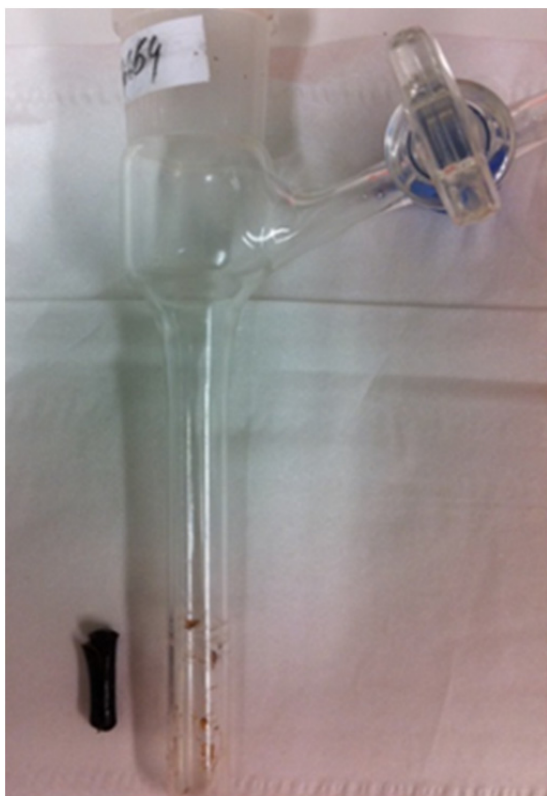

**Figure S1.** Photograph of the used Schlenk flask and the resulting monolithic Bet-PUR-2 material. The dark colour arises from impurities of the used Desmodur RE.

### Porosity Analysis from CO<sub>2</sub> adsorption at 273 K

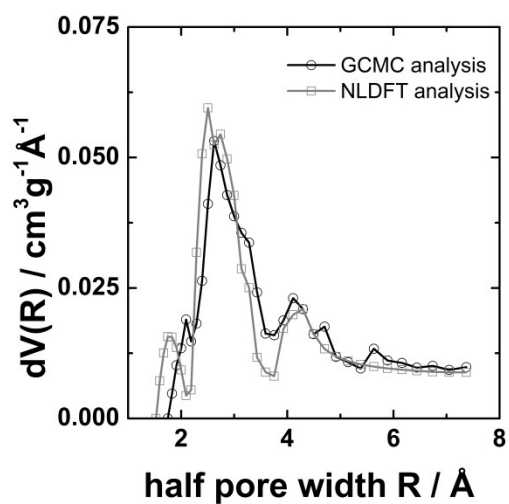

**Figure S2.** pore size distribution of Bet-PUR-1 as obtained from data evaluation based on GCMC or NLDFT models, CO<sub>2</sub> on carbon, slit pores, 273 K

## FTIR

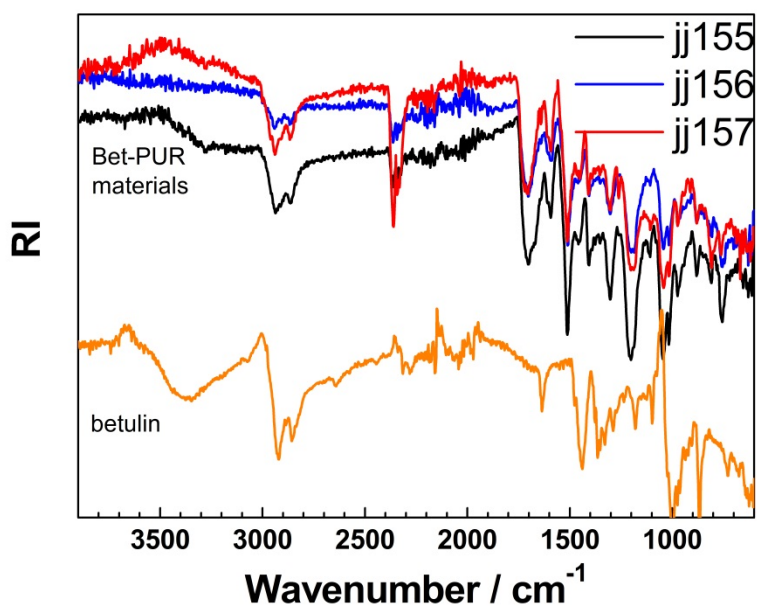

Figure S3. ATR-FTIR spectra of various batches of Bet-PUR-1 and betulin (orange).

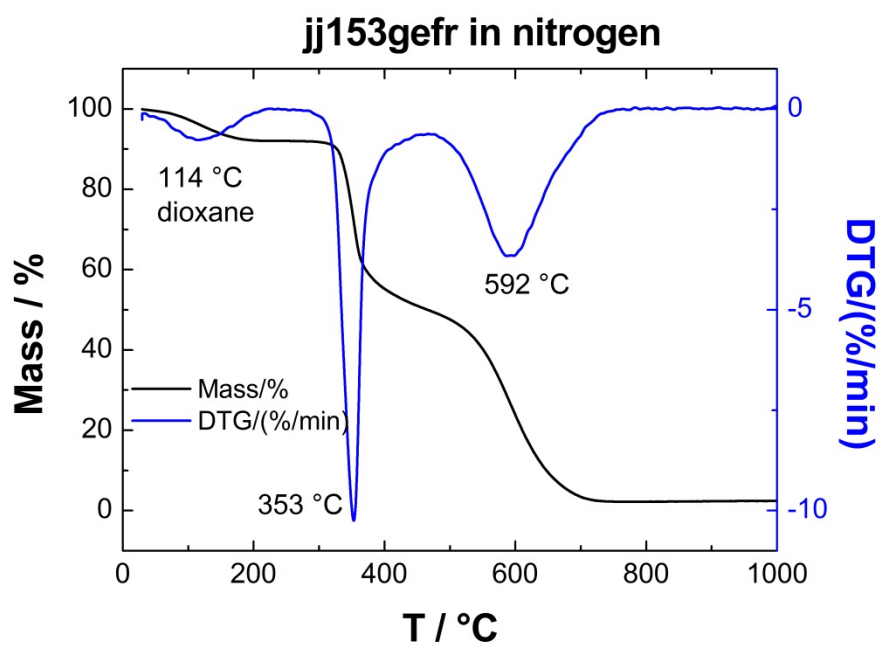

Figure S4. Typical TGA curve of Bet-PUR-1 (N<sub>2</sub> atmosphere, 10K/min)

## Fitting parameters and IAST modeling

Experimental CO<sub>2</sub> adsorption isotherms of Bet-PUR-1 were fitted using a Langmuir model (single site or dual site), yielding an expression for the adsorbed amount  $q$ . N<sub>2</sub> adsorption isotherms were fitted using a single-site Langmuir approach, as dual-site fitting gave a similar result.

Single site Langmuir:

$$q = \frac{(q_i \cdot b_i \cdot p)}{(1 + b_i \cdot p)}$$

$p$ : pressure of the bulk gas at equilibrium with the adsorbed phase,  $q$ : adsorbed amount,  $q_i$ : saturation capacities of component  $i$ ,  $b_i$  affinity coefficients of component  $i$

For curve fitting of the measured data points the following fit equation was used.

Using the measured data of CO<sub>2</sub> and N<sub>2</sub> isotherms at 273 or 283 K and the fit equation, the calculated isotherms were obtained:

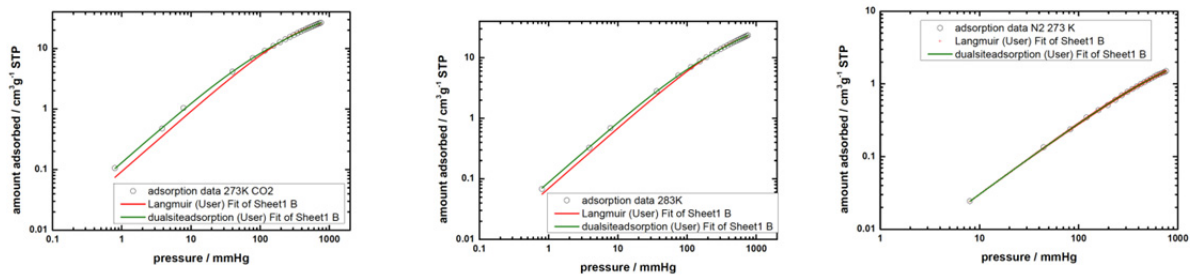

**Figure S5.** dual-site (green solid lines) and single site fits (red solid lines) of CO<sub>2</sub> at 273 K, 283K and N<sub>2</sub> at 273 K plotted together with the experimental data (open circles).

**Table S1:** single site fit parameters

|                | CO <sub>2</sub> (273 K) | CO <sub>2</sub> (283 K) | N <sub>2</sub> (273 K) |
|----------------|-------------------------|-------------------------|------------------------|
| $q$            | 44.04848                | 41.01542                | 4.28742                |
| $b$            | 0.00225                 | 0.0017                  | 7.11E-4                |
| R <sup>2</sup> | 0.99841                 | 0.9991                  | 0.99971                |

Selectivity was calculated using the common IAST equation<sup>1</sup>:

$$\alpha(CO_2 / N_2) = \frac{x_{CO_2} / x_{N_2}}{y_{CO_2} / y_{N_2}}$$

where  $\alpha$  is the selectivity,  $x$  the adsorbed amount and  $y$  represents the gas phase composition.

$x_{CO_2}$  was determined using a Newton-Raphson method implemented within a MatLab® (R2011a) script (see below)

(1) Myers, A. L.; Prausnitz, J. M. *AIChE Journal* **1965**, *11*, 121–127.

```

%Script for calculation of adsorbed amount of component A following IAST
%
%the script uses a Newton-Raphson methodology to calculate x
%input needed: Langmuir parameter of pure component isotherms
%
%           ! pressure is set to mmHg (torr)!
%
%the script gives finally three plots of the spreading pressures for three
%different (arbitrarily choosen) values of x for illustration
%
%contact: jens.weber@mpikg.mpg.de

clear
q=input('input q_a: ');      %internal renaming to avoid use of subscripts)
a=input('input b_a: ');
u=input('input q_b: ');
b=input('input b_b: ');
y=input('input y_a: ');
p=10;

%create file;
S=input('input File Name (format 'filename.txt'): '); %please enter filename using the 'blabla.txt' notation
fid = fopen(S,'w','a');
fprintf(fid, 'parameters (for script using Newton-Raphson methodology):\n\n');
fprintf(fid, 'q_a and b_a:\n');
fprintf(fid, '%f %f\n\n', [q a]);
fprintf(fid, 'q_b and b_b:\n');
fprintf(fid, '%f %f\n\n', [u b]);
fprintf(fid, 'y_a =\n');
fprintf(fid, '%f\n\n', y);
fclose(fid)

for p=10:10:800
    syms x;
    f=(q*log(1+a*y*p/x))-(u*log(1+b*p*(1-y)/(1-x)));
    xRoot=0.999
    g = x-f/diff(f);          %# Create a Newton-Raphson approximation function
    xRoot = subs(g,'x',xRoot) %# Evaluate the function at the initial guess
    xNew = subs(g,'x',xRoot); %# Refined guess
    while abs(xNew-xRoot) > 1e-10 %# Loop while they differ by more than 1e-10
        xRoot = xNew;          %# Update the old guess
        xNew = subs(g,'x',xRoot); %# Update the new guess
    end
    xRoot = xNew;

p
xNew

fid = fopen(S,'a');          % open the file with permission to append
fprintf(fid, '%6.2f %12.8f %6.2f\n', [p xNew i]); % write values at end of file
fclose(fid);                % close the file

end

p=[1:800]
spreada = q*log(1+a*y*p/0.99)
spreadb = u*log(1+b*(1-y)*p/0.01);
plot (p,spreada,p,spreadb)
hlegl=legend('x adsorbed = 0.99')
pause
spreada = q*log(1+a*y*p/0.95)
spreadb = u*log(1+b*(1-y)*p/0.05);
plot (p,spreada,p,spreadb);
hlegl=legend('x adsorbed = 0.95')
pause
spreada = q*log(1+a*y*p/0.90)
spreadb = u*log(1+b*(1-y)*p/0.1);
plot (p,spreada,p,spreadb)
hlegl=legend('x adsorbed = 0.9')

```
